# Supplementary material for: Rapid chromosome territory relocation by nuclear motor activity in response to serum removal in primary human fibroblasts
Source: Springer Nature journal article supplement (doi:10.1186/gb-2010-11-1-r5), 2010-01-13
Supplement: Additional file 4 [file gb-2010-11-1-r5-s4.pdf]

### Comparison of DAPI content

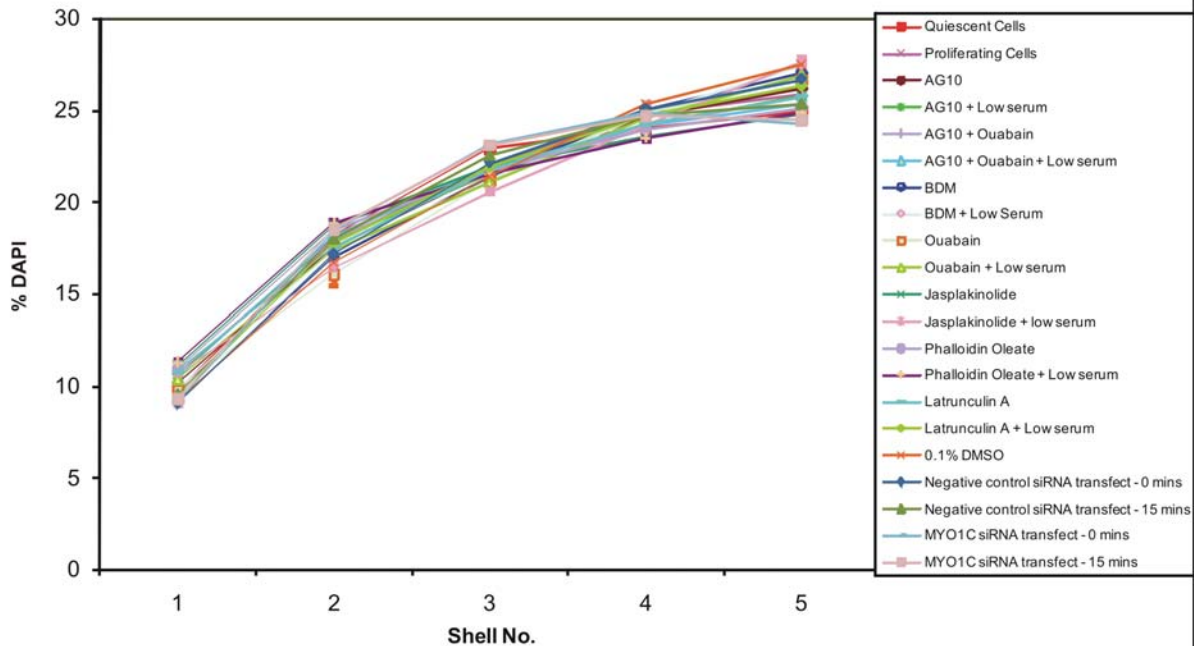

**Figure 4:** A line graph comparing the % of DAPI in each shell created by the erosion script for fibroblast nuclei under different situations analysed in this study.
